# Supplementary material
Source: PubMed Central journal article supplement (PMC2749066)
Supplement: NIHMS124301-supplement-supplement_1.pdf [file NIHMS124301-supplement-supplement_1.pdf]

Supplemental Table 1. Nine *COX-2* SNPs used for genetic analysis

| SNP ID    | Allele Change | Relative Position | Chromosome Position <sup>†</sup> | Function    | Amino Acid Change |
|-----------|---------------|-------------------|----------------------------------|-------------|-------------------|
| rs689466  | A>G           | -1329             | 184917374                        | 5'          |                   |
| rs20417   | G>C           | -899              | 184916944                        | 5' promoter |                   |
| rs2745557 | G>A           | +201              | 184915844                        | intron 1    |                   |
| rs5277    | C>G           | +1225             | 184914820                        | exon 3      | Val102Val         |
| rs2066826 | G>A           | 6+38              | 184912550                        | intron 6    |                   |
| rs5275    | A>G           | +6364             | 184909681                        | 3' UTR      |                   |
| rs2206593 | G>A           | +6993             | 184909052                        | 3' UTR      |                   |
| rs689470  | G>A           | +8364             | 184907681                        | 3' UTR      |                   |
| rs4648310 | A>G           | +8897             | 184907148                        | 3'          |                   |

<sup>†</sup>SNP position based on dbSNP build 129
